# Supplementary material for: The material-enabled oxygen control in thiol-ene microfluidic channels and its feasibility for subcellular drug metabolism assays under hypoxia in vitro
Source: Royal Society of Chemistry journal article supplement (doi:10.1039/d0lc01292k), 2021-01-01
Supplement: d0lc01292k1.pdf [file d0lc01292k1.pdf]

## Supplementary Information

### **The material-enabled oxygen control in thiol-ene microfluidic channels and its feasibility for subcellular drug metabolism assays under hypoxia in vitro**

*Iiro Kiiski<sup>a</sup>, Päivi Järvinen<sup>a</sup>, Elisa Ollikainen<sup>a</sup>, Ville Jokinen<sup>b</sup>, and Tiina Sikanen<sup>\*a</sup>*

<sup>a</sup>Faculty of Pharmacy, Drug Research Program, Division of Pharmaceutical Chemistry and Technology, University of Helsinki, P.O. Box 56 (Viikinkaari 5E), Helsinki, FI-00014, Finland. E-mail: tiina.sikanen@helsinki.fi

<sup>b</sup>Department of Materials Science and Engineering, School of Chemical Engineering Aalto University, Espoo, FI-02150, Finland

### **Liquid chromatography-mass spectrometry method development and validation parameters**

The parameters of the liquid chromatography-mass spectrometry (LC-MS) method used for the analysis of 3'-amino-3'-deoxythymidine (AMT) and zidovudine glucuronide (AZT-G) in Figure 5 are given in Table S1. The LC-MS method was validated in relevant parts for quantitative detection of AMT and AZT-G. The critical method validation parameters are presented in Figure S1 (selectivity; AMT), Figure S2 (selectivity; AZT-G), Table S2 (range, linearity, accuracy, and precision; AMT), and Table S3 (range, linearity, accuracy, and precision; AZT-G).

**Table S1.** LC-MS method parameters used for analysis of 3'-amino-3'-deoxythymidine (AMT, m/z 241.24) and zidovudine glucuronide (ATZ-G, m/z 442.15). SRM=selected reaction monitoring.

| <b>MS parameters</b>         | <b>AMT, m/z 241.24</b>                                                       | <b>AZT-G, m/z 442.15</b>                           |
|------------------------------|------------------------------------------------------------------------------|----------------------------------------------------|
| Instrument                   | Waters Xevo TQ-S triple quadrupole MS                                        |                                                    |
| Ionization mode              | ES+ (positive mode electrospray ionization)                                  | ES- (negative mode electrospray ionization)        |
| Capillary voltage            | 3 kV                                                                         | 2 kV                                               |
| Cone voltage                 | 50 V                                                                         | 54 V                                               |
| Source Offset                | 50 V                                                                         |                                                    |
| Source temperature           | 150 °C                                                                       |                                                    |
| Desolvation temperature      | 500 °C                                                                       |                                                    |
| Cone gas                     | 150 L/h                                                                      |                                                    |
| Desolvation gas              | 1000 L/h                                                                     |                                                    |
| Nebuliser gas                | 7 bar                                                                        |                                                    |
| SRM pairs (collision energy) | 241.24 -> 116.18 (20 V)<br>241.24 -> 98.78 (20 V)                            | 442.15 -> 124.34 (24 V)<br>442.15 -> 112.14 (22 V) |
|                              |                                                                              |                                                    |
| <b>LC parameters</b>         |                                                                              |                                                    |
| Instrument                   | Waters Acquity UPLC                                                          |                                                    |
| Column                       | Waters Acquity UPLC BEH C-18, 100 mm x 2.1 mm (i.d.), 1.7 µm (particle size) |                                                    |
| Precolumn                    | Waters Vanguard BEH C-18, 5mm x 2.1 mm (i.d.), 1.7 µm (particle size)        |                                                    |
| Column temperature           | 40 °C                                                                        |                                                    |
| Flow rate                    | 300 µL/min                                                                   |                                                    |
| Injection volume             | 1 µL                                                                         |                                                    |
| Eluent A                     | 0.1% formic acid (aqueous)                                                   |                                                    |
| Eluent B                     | acetonitrile                                                                 |                                                    |
|                              |                                                                              |                                                    |
| <b>LC gradient</b>           |                                                                              |                                                    |
| Time                         | A%                                                                           | B%                                                 |
| 0.00                         | 100%                                                                         | 0%                                                 |
| 2.00                         | 100%                                                                         | 0%                                                 |
| 7.00                         | 35%                                                                          | 65%                                                |
| 8.00                         | 0%                                                                           | 100%                                               |
| 9.0                          | 0%                                                                           | 100%                                               |
| 9.10                         | 100%                                                                         | 0%                                                 |
| 10.0                         | 100%                                                                         | 0%                                                 |

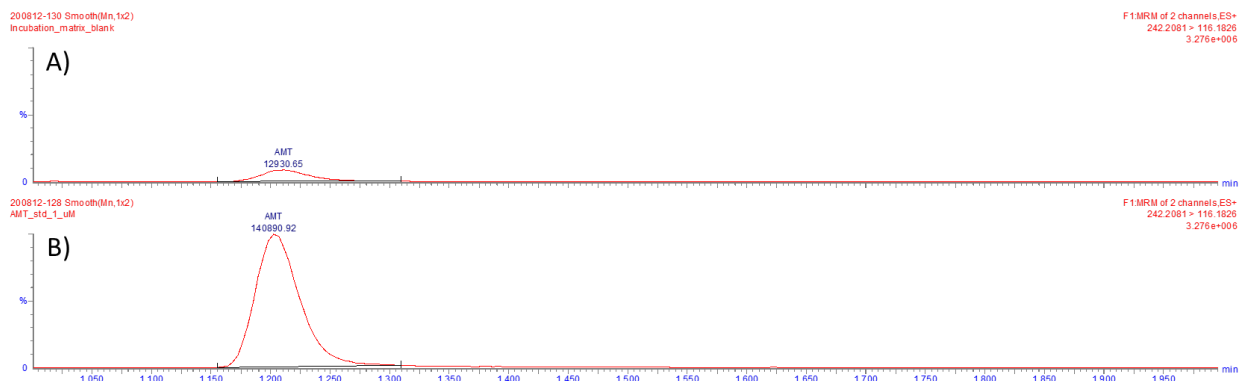

**Figure S1.** Selectivity of the LC-MS method for AMT. Representative ion chromatograms (SRM) of A) blank enzyme incubation matrix and B) blank enzyme incubation matrix spiked with 1  $\mu\text{M}$  AMT. The blank incubation matrix comprised of 0.1 M Tris 5 mM  $\text{MgCl}_2$ , 3 mM zidovudine (substrate), and 1 mM UDPGA and 1 mM NADPH (cosubstrates). The minor background peak at 1.2 min (AMT retention time) in (A) results from photocatalytic, nonenzymatic degradation of zidovudine (substrate) to AMT, as reported by Kurmi et al. (*RSC Adv.* **2017**, 7, 18803) and was subtracted prior to quantitation of the enzymatically produced AMT.

**Table S2.** LC-MS method validation parameters for AMT. The linearity was determined by spiking the blank enzyme incubation matrix (0.1 M Tris 5 mM  $\text{MgCl}_2$ , 1 mM zidovudine, 1 mM UDPGA, 1mM NADPH) with AMT standard. The accuracy and precision were determined from n=6 repeated injections of blank incubation matrix spiked with 1.00  $\mu\text{M}$  AMT.

| Parameter                                       | Result                            |
|-------------------------------------------------|-----------------------------------|
| Range                                           | 0.050–10.0 $\mu\text{M}$          |
| Linearity                                       | $y=130668x-4263$ ( $R^2=0.9999$ ) |
| Accuracy (n=6 injections, 1.00 $\mu\text{M}$ )  | 107.0%                            |
| Precision (n=6 injections, 1.00 $\mu\text{M}$ ) | 1.2%                              |

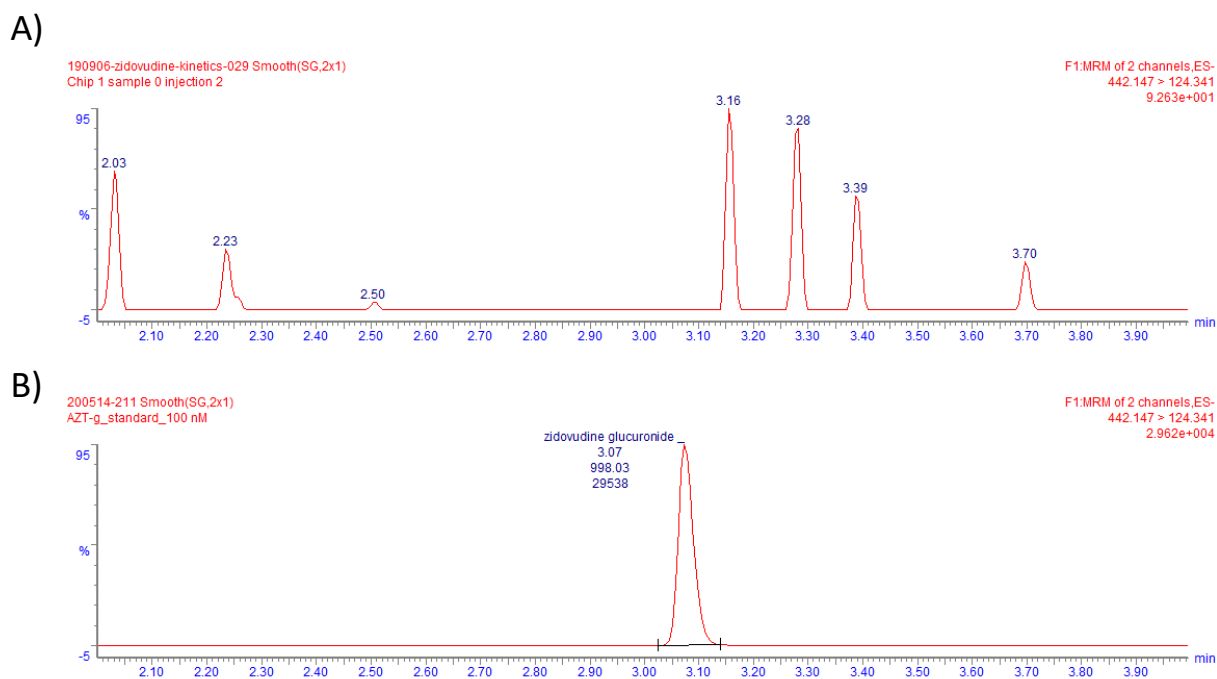

**Figure S2.** Selectivity of the LC-MS method for AZT-G. Ion chromatograms (SRM) of A) blank enzyme incubation matrix (0.1 M Tris 5 mM MgCl<sub>2</sub>, 1 mM zidovudine, 1 mM UDPGA) and B) enzyme incubation matrix spiked with 0.10 μM zidovudine-glucuronide.

**Table S3.** LC-MS method validation parameters for AZT-G. The linearity was determined by spiking the blank enzyme incubation matrix (0.1 M Tris 5 mM MgCl<sub>2</sub>, 1 mM zidovudine, 1 mM UDPGA) with AZT-G standard. The accuracy and precision were determined from n=6 repeated injections of blank incubation matrix spiked with 0.10 μM AZT-G.

| Parameter                            | Result                        |
|--------------------------------------|-------------------------------|
| Range                                | 0.001–5.00 μM                 |
| Linearity                            | $y=8.8x+200$ ( $R^2=0.9994$ ) |
| Accuracy (n=6 injections, 0.100 μM)  | 108.0%                        |
| Precision (n=6 injections, 0.100 μM) | 4.4%                          |

**Table 4.** Best-fit values for the rate constant  $k$  ( $\text{min}^{-1}$ ) of oxygen-depletion in rectangular OSTE channels in static conditions for different off-stoichiometric and stoichiometric thiol-ene compositions, including the impact of heat treatment (HT, 110 °C, overnight) as well as surface biotinylation on  $k$ . PETMP = pentaerythritol tetrakis(3-mercaptopropionate), TMPTMP = trimethylolpropane tris(3-mercaptopropionate), PI = photoinitiator (0.1%, m/v, TPO-L). The allyl component in all compositions was triallyl-1,3,5-triazine-2,4,6(1*H*,3*H*,5*H*)-trione (TATATO). nd = not determined

| Thiol component<br>(postcure treatment) | Bulk composition         |                            |                         |                          |
|-----------------------------------------|--------------------------|----------------------------|-------------------------|--------------------------|
|                                         | +50 mol-% thiol          | +25 mol-% thiol            | stoichiometric          | +25 mol-% allyl, w/ PI   |
| PETMP                                   | 0.049 $\text{min}^{-1}$  | 0.038 $\text{min}^{-1}$ a) | 0.034 $\text{min}^{-1}$ | 0.0072 $\text{min}^{-1}$ |
| PETMP<br>(heat treated)                 | 0.0034 $\text{min}^{-1}$ | nd                         | nd                      | nd                       |
| PETMP<br>(biotinylated)                 | 0.039 $\text{min}^{-1}$  | nd                         | nd                      | nd                       |
| TMPTMP                                  | 0.014 $\text{min}^{-1}$  | nd                         | 0.018 $\text{min}^{-1}$ | 0.013 $\text{min}^{-1}$  |
| TMPTMP<br>(heat treated)                | 0.0016 $\text{min}^{-1}$ | nd                         | nd                      | nd                       |

<sup>a)</sup> For +25 mol-% thiol-rich composition of PETMP, the rate constant was also determined in the presence of the PI and was 0.040  $\text{min}^{-1}$ .
